# Supplementary material for: The Impact of Peer Education, Utilizing the Pender Model, On Health Literacy, Lifestyle Adjustments, And Health-Promoting Behaviors Aimed at Preventing Type-2 Diabetes Among University Students
Source: Research Square preprint supplement (doi:10.21203/rs.3.rs-7296014/v1), 2025-08-28
Supplement: Supplementary file 1 [file 76a90be767921a0f12f580df.docx]

**Health Promoting Lifestyle Questionnaire**

| **Row** | **Statements** | **Never** | **Sometimes** | **Often** | **Always** |
| --- | --- | --- | --- | --- | --- |
| 1 | I feel that I am progressing and growing in a positive direction. |  |  |  |  |
| 2 | I am satisfied with myself and feel at peace. |  |  |  |  |
| 3 | I am hopeful about the future. |  |  |  |  |
| 4 | I believe my life has meaning. |  |  |  |  |
| 5 | I strive to achieve long-term goals in life. |  |  |  |  |
| 6 | I am aware of things in life that matter to me. |  |  |  |  |
| 7 | Each day of life is interesting and challenging for me. |  |  |  |  |
| 8 | I feel connected to forces greater than myself. |  |  |  |  |
| 9 | I receive support from a group of people who care about me and are concerned for me. |  |  |  |  |
| 10 | I balance work and recreation. |  |  |  |  |
| 11 | I am ready to learn new experiences. |  |  |  |  |
| 12 | I seek information from professionals about how to take proper care of myself. |  |  |  |  |
| 13 | I participate in educational programs on personal health care. |  |  |  |  |
| 14 | I check my heart rate when exercising. |  |  |  |  |
| 15 | I discuss health concerns with healthcare professionals. |  |  |  |  |
| 16 | I report unusual symptoms to a doctor or other health staff. |  |  |  |  |
| 17 | I discuss my problems and concerns with those around me. |  |  |  |  |
| 18 | I read or watch content about maintaining and improving health. |  |  |  |  |
| 19 | I choose a diet that is low in fat and/or low in saturated fat and cholesterol. |  |  |  |  |
| 20 | I read the labels on packaged foods for fats and sodium (like canned goods, etc.). |  |  |  |  |
| 21 | I ask health staff such as doctors and nurses to clarify their instructions. |  |  |  |  |
| 22 | If necessary, I seek counseling or guidance. |  |  |  |  |
| 23 | I receive support from a group of people who care about me and are concerned for me. |  |  |  |  |
| 24 | When I ask health experts, doctors, and nurses about health issues, I would like a lot of information. |  |  |  |  |
| 25 | I spend time with close friends. |  |  |  |  |
| 26 | I have meaningful and satisfying relationships with others. |  |  |  |  |
| 27 | Expressing concern, love, and intimacy to others is easy for me. |  |  |  |  |
| 28 | I find ways to create intimate and close relationships. |  |  |  |  |
| 29 | I am touched by and touch those who I admire or who admire me. |  |  |  |  |
| 30 | I resolve my problems through discussion and agreement with others. |  |  |  |  |
| 31 | I focus on good thoughts when going to sleep. |  |  |  |  |
| 32 | I easily compliment others for their successes. |  |  |  |  |
| 33 | I use specific methods to manage my stress. |  |  |  |  |
| 34 | I get enough sleep. |  |  |  |  |
| 35 | I set aside daily time for relaxation and muscle release. |  |  |  |  |
| 36 | I walk to prevent fatigue. |  |  |  |  |
| 37 | I accept life issues that I cannot change. |  |  |  |  |
| 38 | I practice relaxation methods such as yoga for 20-15 minutes daily. |  |  |  |  |
| 39 | I exercise in my regular daily activities (e.g., walking at lunch, taking stairs instead of the elevator, parking farther away and walking to work, etc.). |  |  |  |  |
| 40 | I participate in light to moderate physical activities (e.g., five days a week of brisk walking for 40-30 minutes each day). |  |  |  |  |
| 41 | I exercise intensely at least 3 times a week for 20 minutes or more (cycling, brisk walking, running, etc.). |  |  |  |  |
| 42 | I have a regular exercise program. |  |  |  |  |
| 43 | I spend my leisure time with physical activity (e.g., swimming, cycling). |  |  |  |  |
| 44 | I exercise during regular daily activities (e.g., walking at lunch, taking stairs, parking far away, etc.). |  |  |  |  |
| 45 | I perform stretching exercises at least 3 times a week. |  |  |  |  |
| 46 | During exercise my heart rate reaches the desired level. |  |  |  |  |
| 47 | I eat breakfast. |  |  |  |  |
| 48 | I limit the use of sugar and sweets. |  |  |  |  |
| 49 | I eat 5-3 servings of fruits and vegetables daily. |  |  |  |  |
| 50 | I consume only 3-2 servings of red meat, poultry, dried beans, eggs, and nuts daily. |  |  |  |  |
| 51 | I eat 3-2 servings of milk, yogurt, or cheese daily. |  |  |  |  |
| 52 | I eat 6-11 servings of bread, rice, and pasta daily. |  |  |  |  |

**Health Literacy Questionnaire**

| **Row** | **Statements** | **Strongly disagree** | **Disagree** | **Neutral** | **Agree** | **Strongly agree** |
| --- | --- | --- | --- | --- | --- | --- |
| 1 | Reading educational material about health and wellness (pamphlet) - handouts, educational and promotional projections (easy for me) |  |  |  |  |  |
| 2 | Reading written medical instructions that doctors, dentists, and health workers write about health issues |  |  |  |  |  |
| 3 | Reading medical and dental procedures (such as admission forms, consent forms, record creation, etc.) |  |  |  |  |  |
| 4 | Writings on the leaflets and instructions prepared for performing tests |  |  |  |  |  |
| 5 | I can obtain the health and medical information I need from various sources |  |  |  |  |  |
| 6 | I can obtain information about healthy nutrition |  |  |  |  |  |
| 7 | I can obtain information about mental health, such as depression and stress |  |  |  |  |  |
| 8 | I can obtain information about diseases related to the hand |  |  |  |  |  |
| 9 | I can obtain the necessary information about health and wellness issues from various sources |  |  |  |  |  |
| 10 | I can obtain information about health issues and the risks of drug use |  |  |  |  |  |
| 11 | Explanations related to healthy health or healthy nutrition |  |  |  |  |  |
| 12 | Explanations that a doctor gives about a disease are conveyed to me |  |  |  |  |  |
| 13 | The meaning and concept of the text written in medical and dental forms and satisfaction |  |  |  |  |  |
| 14 | The meaning and concept of signs and information written on health boards in hospitals and treatment centers |  |  |  |  |  |
| 15 | I write down how drugs are taken and what is written on the medications |  |  |  |  |  |
| 16 | I write down the advantages and disadvantages of treatment methods prescribed by a doctor |  |  |  |  |  |
| 17 | I understand the meaning and concept of the content written on health leaflets and guides |  |  |  |  |  |
| 18 | I evaluate the accuracy of the information provided about health on the internet |  |  |  |  |  |
| 19 | I can evaluate the accuracy of health information provided by TV and radio |  |  |  |  |  |
| 20 | I understand the accuracy of physician explanations about diseases |  |  |  |  |  |
| 21 | I can convey health explanations to researchers |  |  |  |  |  |
| 22 | By looking at the symptoms of illness, I can know whom to consult |  |  |  |  |  |
| 23 | When the doctor says the quality of the biography is important |  |  |  |  |  |
| 24 | I will not stop taking the medications prescribed for my illness without permission |  |  |  |  |  |
| 25 | If a first-degree relative has cancer, I read that I should visit a doctor |  |  |  |  |  |
| 26 | I avoid doing things and using substances that increase blood pressure |  |  |  |  |  |
| 27 | Even if I notice any symptom of illness, I will consult a doctor |  |  |  |  |  |
| 28 | In every task I follow health care practices |  |  |  |  |  |
| 29 | If I have questions about my illness, I ask the medical and health staff |  |  |  |  |  |
| 30 | I purchase dairy products according to the fat percentage |  |  |  |  |  |
| 31 | I avoid doing things or using substances that cause weight gain |  |  |  |  |  |
| 32 | I use a safe card while driving |  |  |  |  |  |
| 33 | When buying foods, I pay attention to their price and nutritional value |  |  |  |  |  |
